# Supplementary material for: Investigating the Effect of Processing and Material Parameters of Alginate Dialdehyde-Gelatin (ADA-GEL)-Based Hydrogels on Stiffness by XGB Machine Learning Model
Source: MDPI journal article supplement (doi:10.3390/bioengineering11050415), 2024-04-24
Supplement: s1 [file s1]

## Supplementary

**Table S1.** Composition, crosslinker concentrations and physical properties of the prepared hydrogels [1,2,7,8,15,31,40,42,43,48–51].

| Indices | ADA<br>(w/v) | Gelatin<br>(w/v) | with/without<br>cells<br>(printed/not<br>printed) | CaCl <sub>2</sub><br>(M) | mTG<br>(w/v) | Pore<br>size<br>(μm) | Bioactive<br>component | Degree of<br>oxidation | Stiffness<br>(kPa) | Ref. |
|---------|--------------|------------------|---------------------------------------------------|--------------------------|--------------|----------------------|------------------------|------------------------|--------------------|------|
| 1       | 2.5          | 2.5              | Without cells<br>(not printed)                    | 0.1                      | 0            | 450                  | 0                      | 35                     | 135                | [43] |
| 2       | 2.5          | 2.5              | Without cells<br>(not printed)                    | 0.1                      | 0            | 450                  | 1                      | 60                     | 304                | [43] |
| 3       | 2.5          | 2.5              | Without cells<br>(not printed)                    | 0.1                      | 0            | 450                  | 5                      | 75                     | 417                | [43] |
| 4       | 3.35         | 6.65             | Without cells<br>(Not printed)                    | 0.1                      | 5            | 500                  | 0                      | N/A                    | 13                 | [51] |
| 5       | 2.5          | 3.75             | Without cells<br>(printed)                        | 0.2                      | 0            | 500                  | 0                      | N/A                    | 10                 | [42] |
| 6       | 2.5          | 3.75             | Without cells<br>(printed)                        | 0.2                      | 0            | 500                  | 0.1                    | N/A                    | 50                 | [42] |
| 7       | 3.75         | 3.75             | Without cells<br>(printed)                        | 0.1                      | 0            | 4000                 | 0                      | N/A                    | 4.2                | [48] |
| 8       | 3.75         | 3.75             | Without cells<br>(printed)                        | 0.1                      | 0            | 4000                 | 0                      | N/A                    | 3.9                | [48] |
| 9       | 3.75         | 3.75             | Without cells<br>(printed)                        | 0.1                      | 0            | 4000                 | 0                      | N/A                    | 5                  | [48] |
| 10      | 3.75         | 3.75             | Without cells<br>(printed)                        | 0.1                      | 0            | 4000                 | 0                      | N/A                    | 2                  | [48] |
| 11      | 3.75         | 3.75             | Without cells<br>(printed)                        | 0.1                      | 0            | 4000                 | 0                      | N/A                    | 1                  | [48] |
| 12      | 3.75         | 3.75             | Without cells<br>(printed)                        | 0.5                      | 0            | 4000                 | 0                      | N/A                    | 5                  | [48] |
| 13      | 3.75         | 3.75             | Without cells<br>(printed)                        | 0.5                      | 0            | 4000                 | 0                      | N/A                    | 4.5                | [48] |
| 14      | 3.75         | 3.75             | Without cells<br>(printed)                        | 0.5                      | 0            | 4000                 | 0                      | N/A                    | 5.4                | [48] |
| 15      | 3.75         | 3.75             | Without cells<br>(printed)                        | 0.5                      | 0            | 4000                 | 0                      | N/A                    | 2.5                | [48] |
| 16      | 3.75         | 3.75             | Without cells<br>(printed)                        | 0.5                      | 0            | 4000                 | 0                      | N/A                    | 1.9                | [48] |
| 17      | 3.75         | 3.75             | Chondrocyte<br>laden (printed)                    | 0.4                      | 2.5          | 217                  | 0                      | N/A                    | 24                 | [7]  |
| 18      | 3.75         | 7.5              | Chondrocyte<br>laden (printed)                    | 0.4                      | 2.5          | 217                  | 0                      | N/A                    | 35                 | [7]  |
| 19      | 7.5          | 3.75             | Without cells<br>(printed)                        | 0.5                      | 0            | 1000                 | 0                      | N/A                    | 11.5               | [1]  |
| 20      | 7.5          | 3.75             | Without cells<br>(printed)                        | 0.5                      | 0            | 1000                 | 0                      | N/A                    | 12                 | [1]  |
| 21      | 3.575        | 7.5              | Without cells<br>(printed)                        | 0.1                      | 2.5          | 1000                 | 0                      | N/A                    | 100                | [49] |

|    |      |      |                                  |     |     |      |     |     |      |      |
|----|------|------|----------------------------------|-----|-----|------|-----|-----|------|------|
| 22 | 2.5  | 3.75 | Without cells<br>(printed)       | 0.6 | 0   | 1000 | 0   | 13  | 110  | [50] |
| 23 | 2.5  | 3.75 | Without cells<br>(printed)       | 0.1 | 0   | 1000 | 0   | N/A | 135  | [8]  |
| 24 | 3.75 | 7.5  | MC3T3-E1 cell<br>laden (printed) | 0.1 | 10  | 370  | 0   | N/A | 10   | [40] |
| 25 | 3.75 | 7.5  | Without cells<br>(printed)       | 0.1 | 0   | 1000 | 0   | N/A | 4    | [15] |
| 26 | 3.75 | 7.5  | Without cells<br>(printed)       | 0.1 | 0.1 | 1000 | 0   | N/A | 3.5  | [15] |
| 27 | 3.75 | 7.5  | Without cells<br>(printed)       | 0.1 | 1   | 1000 | 0   | N/A | 4    | [15] |
| 28 | 3.75 | 7.5  | Without cells<br>(printed)       | 0.1 | 2.5 | 1000 | 0   | N/A | 10   | [15] |
| 29 | 3.75 | 7.5  | Without cells<br>(printed)       | 0.1 | 5   | 1000 | 0   | N/A | 25   | [15] |
| 30 | 3.75 | 7.5  | Without cells<br>(printed)       | 0.1 | 10  | 1000 | 0   | N/A | 100  | [15] |
| 31 | 2.5  | 2.5  | hiPSC<br>(not printed)           | 0.1 | 0   | 1000 | 0   | 19  | 17   | [31] |
| 32 | 5    | 7.5  | Without cells<br>(not printed)   | 0.2 | 0   | 1000 | 0   | N/A | 14   | [2]  |
| 33 | 5    | 7.5  | Without cells<br>(not printed)   | 0.2 | 0   | 1000 | 0.1 | N/A | 22.5 | [2]  |
